# Supplementary material
Source: PubMed Central journal article supplement (PMC8635319)
Supplement: 10549_2021_6458_MOESM1_ESM.pdf [file 10549_2021_6458_MOESM1_ESM.pdf]

**Supplementary table 1** Baseline characteristics of responders and non-responders of the COVID-19-specific survey during the first and second wave of the COVID-19 pandemic, i.e., April 2020 and November 2020, respectively.

|                                                          | First wave                    |       |                                  |       | Second wave                  |       |                                  |       |
|----------------------------------------------------------|-------------------------------|-------|----------------------------------|-------|------------------------------|-------|----------------------------------|-------|
|                                                          | Responders<br>(n=1106, 69.3%) |       | Non-responders<br>(n=489, 30.7%) |       | Responders<br>(n=822, 50.9%) |       | Non-responders<br>(n=792, 49.1%) |       |
| <b>Patient characteristics</b>                           |                               |       |                                  |       |                              |       |                                  |       |
| Age in years, mean (range)                               | 56                            | 24-82 | 55                               | 27-92 | 57                           | 29-83 | 55                               | 24-92 |
| Sex, No. (%)                                             |                               |       |                                  |       |                              |       |                                  |       |
| Female                                                   | 1100                          | 99.5  | 487                              | 99.6  | 819                          | 99.6  | 788                              | 99.5  |
| Male                                                     | 6                             | 0.5   | 2                                | 0.4   | 3                            | 0.4   | 4                                | 0.5   |
| Body Mass Index <sup>1</sup> , mean (SD)                 | 26.1                          | 4.7   | 26.4                             | 5.1   | 26.1                         | 4.7   | 26.3                             | 4.9   |
| Missing, No. (%)                                         | 11                            | 1.0   | 42                               | 8.6   | 45                           | 5.5   | 72                               | 9.1   |
| Highest educational level                                |                               |       |                                  |       |                              |       |                                  |       |
| Primary or (post-)secondary school                       | 488                           | 44.1  | 225                              | 46.0  | 339                          | 41.2  | 349                              | 44.1  |
| College, graduate or professional degree                 | 609                           | 55.1  | 222                              | 45.4  | 439                          | 53.5  | 372                              | 47.0  |
| Unknown                                                  | 9                             | 0.8   | 42                               | 8.6   | 44                           | 5.4   | 71                               | 9.0   |
| Current living situation                                 |                               |       |                                  |       |                              |       |                                  |       |
| With partner and/or child(ren)                           | -                             | -     | -                                | -     | 647                          | 78.8  | -                                | -     |
| Alone/other                                              | -                             | -     | -                                | -     | 175                          | 21.3  | -                                | -     |
| Follow-up time in months, median (range)                 | 29                            | 1-78  | 32                               | 1-78  | 33                           | 1-85  | 37                               | 1-85  |
| <b>Tumor characteristics</b>                             |                               |       |                                  |       |                              |       |                                  |       |
| Pathological T stadium, No. (%)                          |                               |       |                                  |       |                              |       |                                  |       |
| 0 + In situ (IS)                                         | 173                           | 15.6  | 91                               | 18.6  | 121                          | 14.7  | 134                              | 16.9  |
| I                                                        | 641                           | 58.0  | 264                              | 54.0  | 442                          | 53.8  | 416                              | 52.5  |
| II-IV                                                    | 238                           | 21.5  | 112                              | 22.9  | 178                          | 21.6  | 171                              | 21.6  |
| X + unknown                                              | 54                            | 4.9   | 22                               | 4.5   | 81                           | 9.9   | 71                               | 9.0   |
| <b>Treatment characteristics</b>                         |                               |       |                                  |       |                              |       |                                  |       |
| Type of breast surgery                                   |                               |       |                                  |       |                              |       |                                  |       |
| Breast conserving therapy                                | 863                           | 78.0  | 393                              | 80.4  | 619                          | 75.3  | 582                              | 73.5  |
| Mastectomy ± delayed reconstruction                      | 106                           | 9.6   | 39                               | 8.0   | 69                           | 8.4   | 76                               | 9.6   |
| Mastectomy with direct breast reconstruction             | 109                           | 9.9   | 46                               | 9.4   | 69                           | 8.4   | 84                               | 10.6  |
| None                                                     | 20                            | 1.8   | 9                                | 1.8   | 14                           | 1.7   | 13                               | 1.6   |
| Unknown                                                  | 8                             | 0.7   | 2                                | 0.4   | 51                           | 6.2   | 37                               | 4.7   |
| Systemic therapy <sup>2</sup>                            |                               |       |                                  |       |                              |       |                                  |       |
| No systemic therapy                                      | 410                           | 37.1  | 172                              | 35.2  | 278                          | 33.8  | 282                              | 35.6  |
| Chemotherapy                                             | 100                           | 9.0   | 53                               | 10.8  | 77                           | 9.4   | 72                               | 9.1   |
| Endocrine therapy                                        | 201                           | 18.2  | 99                               | 20.2  | 155                          | 18.9  | 130                              | 16.4  |
| Immunotherapy                                            | 0                             | 0.0   | 1                                | 0.2   | 0                            | 0.0   | 1                                | 0.1   |
| Combination of above <sup>3</sup>                        | 387                           | 35.0  | 162                              | 33.1  | 261                          | 31.8  | 270                              | 34.1  |
| Unknown                                                  | 8                             | 0.7   | 2                                | 0.4   | 51                           | 6.2   | 37                               | 4.7   |
| Radiation therapy                                        |                               |       |                                  |       |                              |       |                                  |       |
| Yes                                                      | 993                           | 89.8  | 438                              | 89.6  | 702                          | 85.4  | 672                              | 84.8  |
| None                                                     | 77                            | 7.0   | 38                               | 7.8   | 47                           | 5.7   | 62                               | 7.8   |
| Unknown                                                  | 36                            | 3.3   | 13                               | 2.7   | 73                           | 8.9   | 58                               | 7.3   |
| Currently receiving breast cancer treatment <sup>4</sup> |                               |       |                                  |       |                              |       |                                  |       |
| Yes                                                      | 350                           | 31.6  | -                                | -     | 269                          | 32.7  | -                                | -     |
| No                                                       | 756                           | 68.4  | -                                | -     | 553                          | 67.3  | -                                | -     |

Baseline characteristics of the responders and non-responders of the first COVID-19 wave may differ from previously published results [8], as clinical data were routinely updated by the Netherlands Cancer Registry, and the number of responses to the first COVID-19-specific survey increased after analyzing the first responses (due to the timely subject, only responses received before April 24, 2020 were used for analyses in our previous publication [8]).

As a result of rounding, percentages may not add up a 100%.

Abbreviations: *No.* Number; *SD* Standard deviation.

Legend: - Not applicable

<sup>1</sup> Calculated as weight/height<sup>2</sup>.

<sup>2</sup> Pre- and/ or postoperative therapy.

<sup>3</sup> Combination of chemotherapy, endocrine therapy and/or immunotherapy.

<sup>4</sup> Active treatment is defined as receiving chemotherapy, endocrine therapy, immunotherapy and/or radiation therapy at the time of completing the COVID-19-specific survey.
